# Supplementary material for: Understanding segregation processes in SAMs formed by mixtures of hydroxylated and non-hydroxylated fatty acids
Source: Royal Society of Chemistry journal article supplement (doi:10.1039/c9ra06799j), 2019-01-01
Supplement: c9ra06799j1.pdf [file c9ra06799j1.pdf]

## Understanding segregation processes in SAMs formed by mixtures of hydroxylated and non-hydroxylated fatty acids

Otto V.M. Bueno, J. J. Benítez and Miguel A. San-Miguel

### ELECTRONIC SUPPLEMENTARY INFORMATION

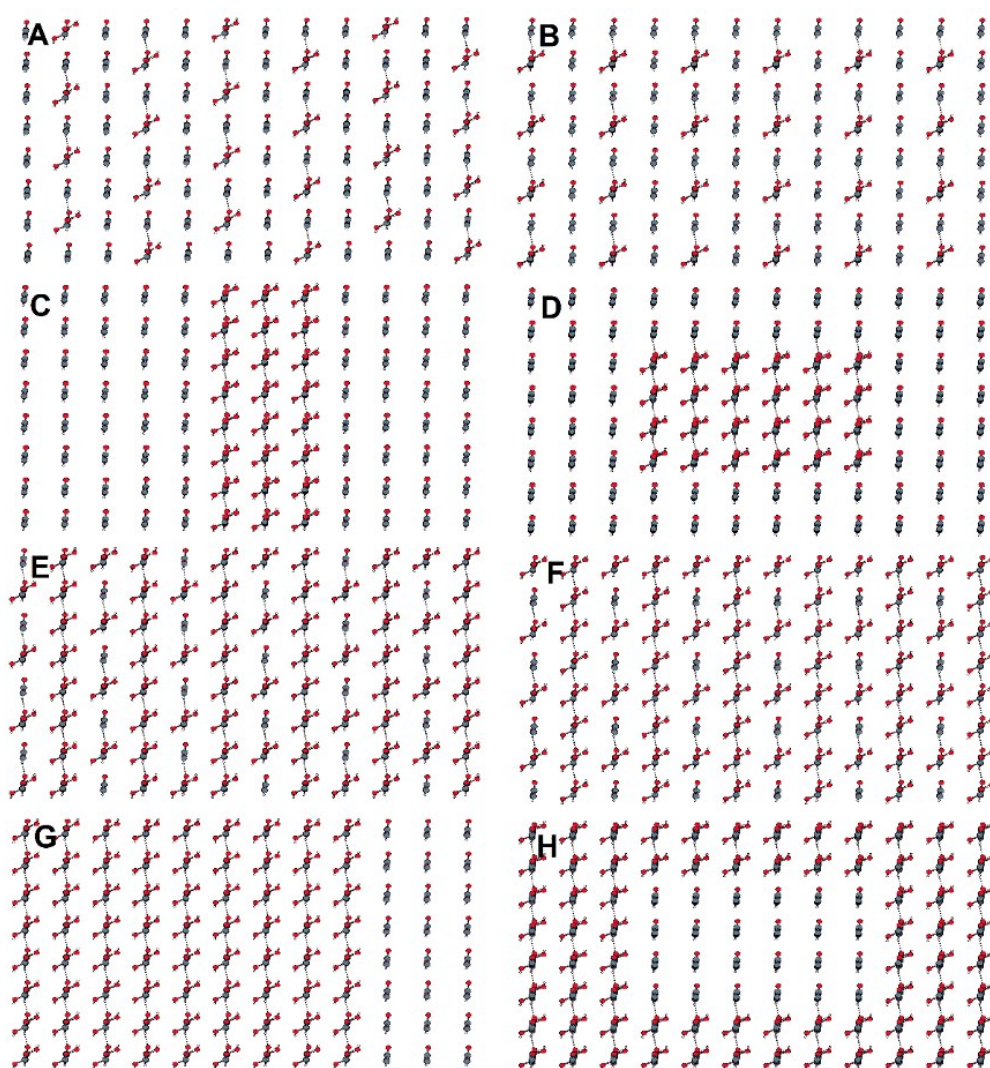

**Figure S1.** Top views of initial configurations in a rectangular network of 25:75 (A, B, C and D) and 75:25 (E, F, G and H) ALE:PAL compositions. Segregated systems are set up in column (C and G) and island (D and H).

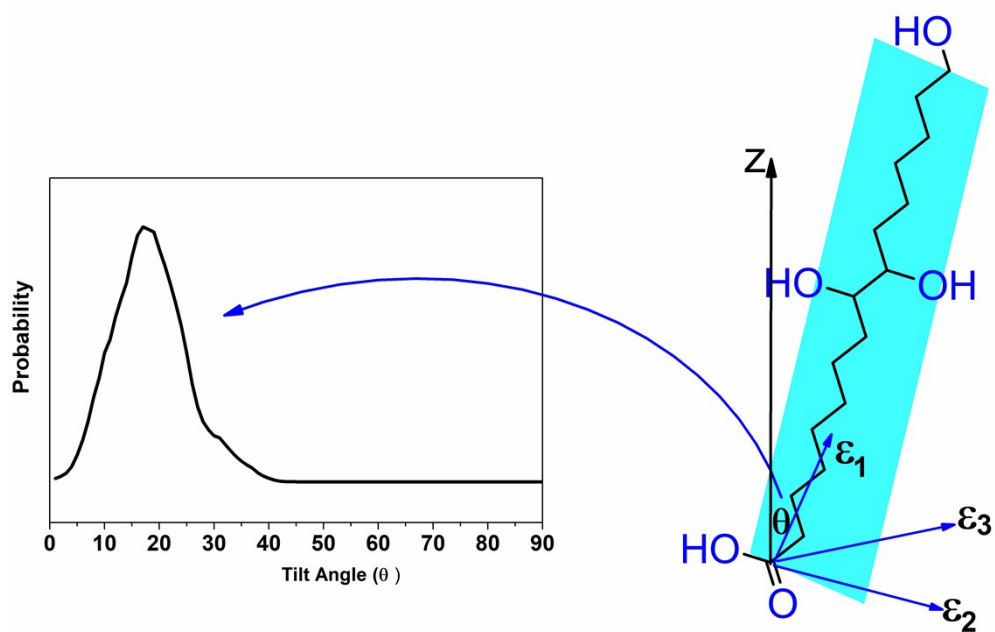

**Figure S2.** Tilt-angle distribution for pure ALE system of the inclination angle formed by vectors  $\epsilon_1$  and Z axis.

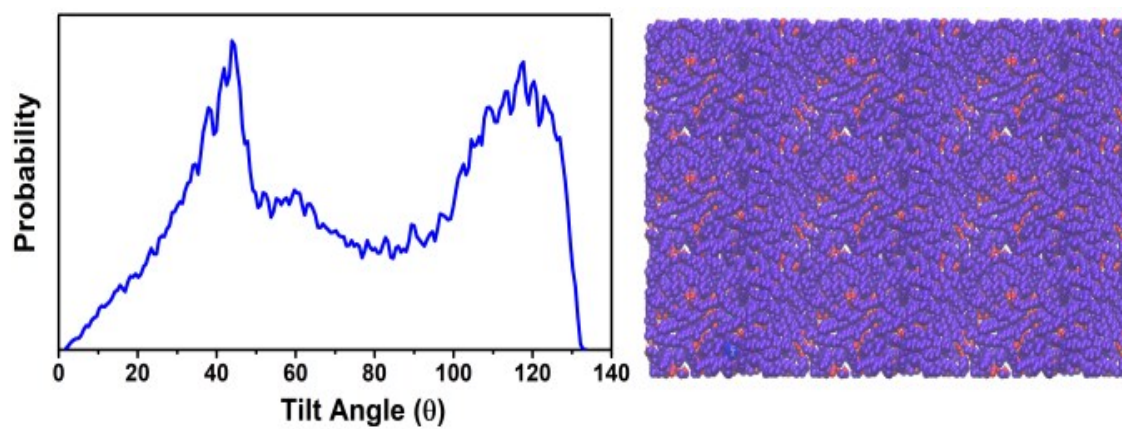

**Figure S3.** The tilt-angle distribution for pure PAL system.



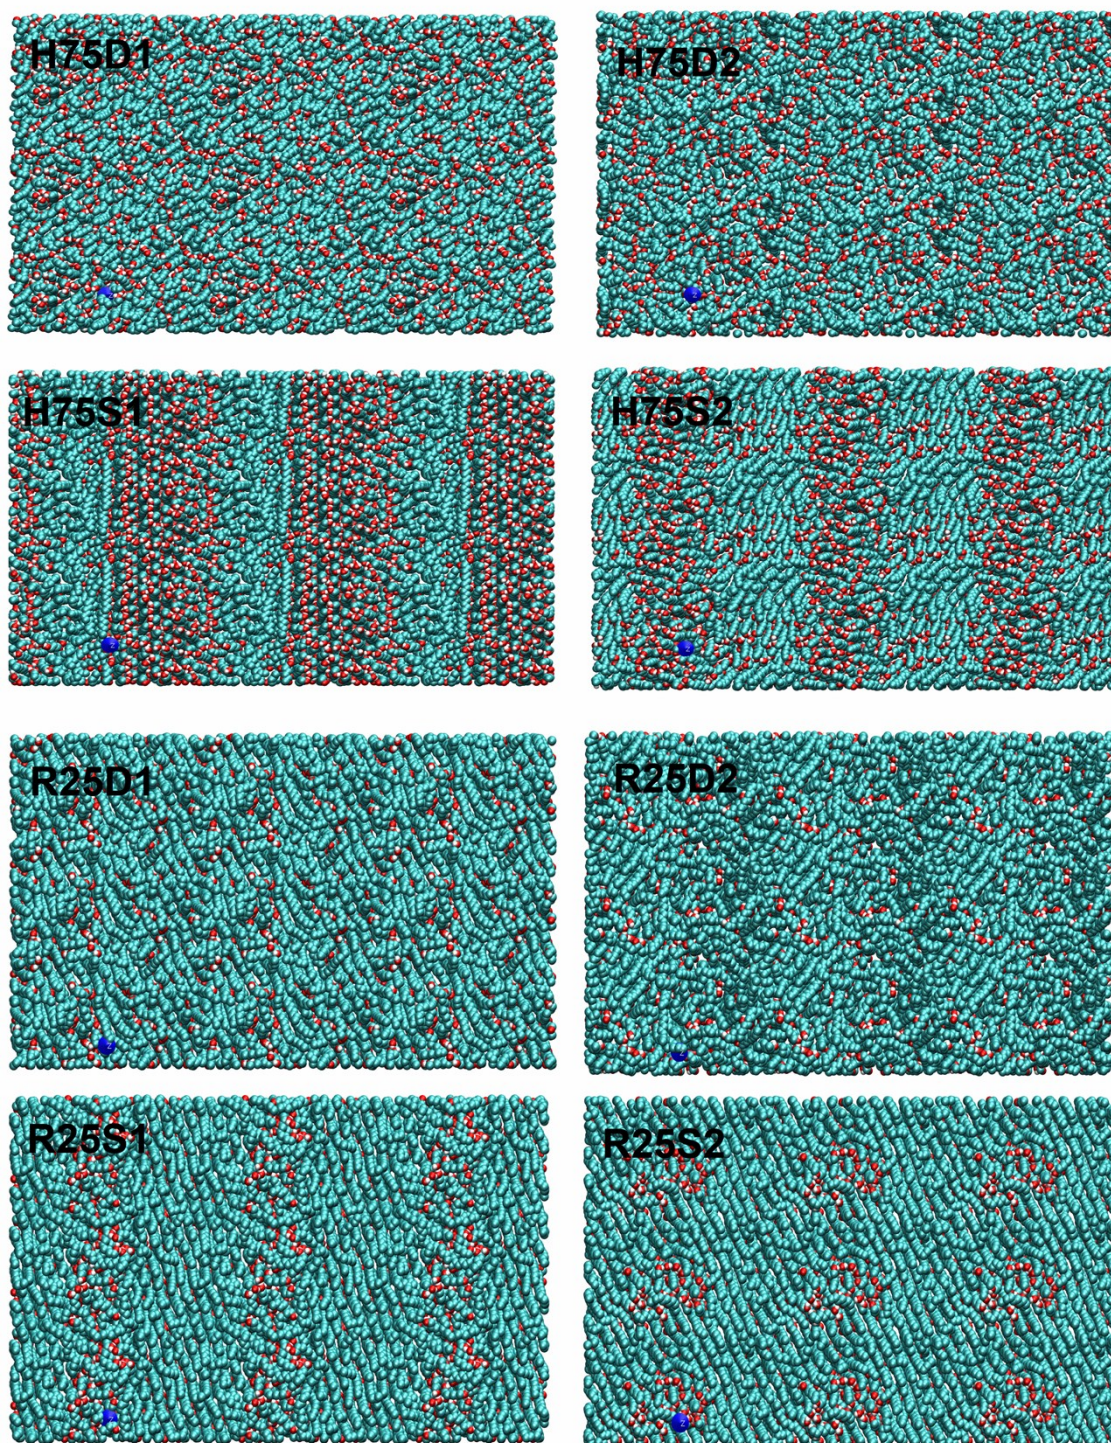

**Figure S4.** Top views of final configurations of the 75:25 and 25:75 ALE:PAL mixed systems.



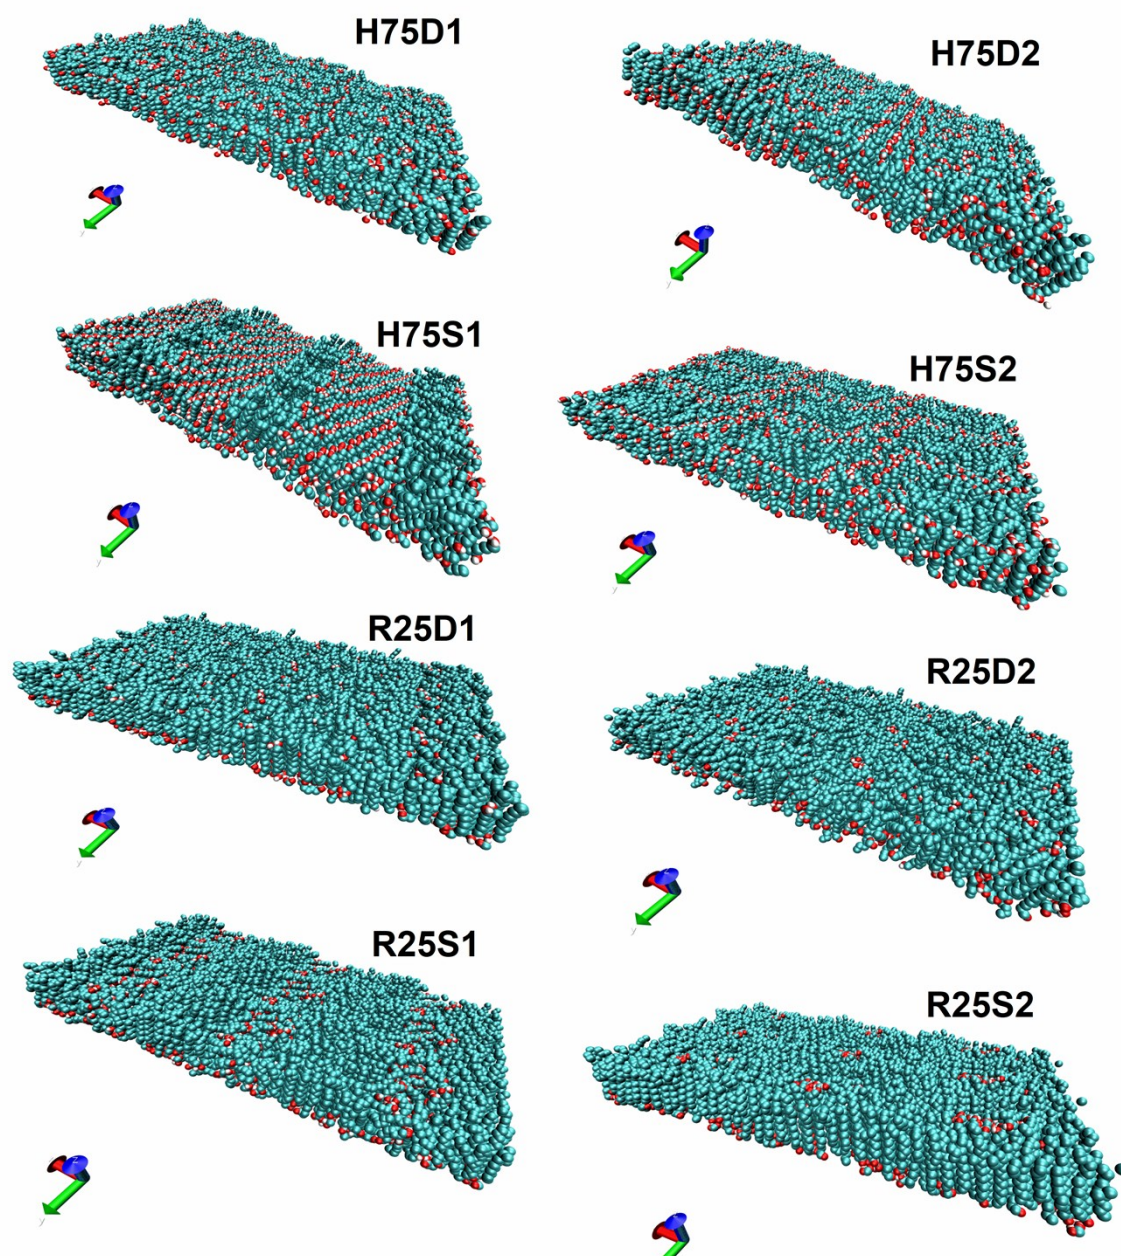

**Figure S5.** Rotated side views of final configurations of the 75:25 and 25:75 ALE:PAL mixed systems.
